# Supplementary material
Source: publisher site journal article supplement (https://www.dovepress.com/article/423054)
Supplement: Supplementary file 1 [file get_supplementary_file.php]

**Supplementary materials**

MEDLINE (PubMed)

#1. Wound* OR injur* OR ulcer* OR chronic OR hard-to-heal OR non-healing

#2. Vibrat* OR “vibration therap” OR “whole body vibratio” OR “local vibratio”

#3. Ultraso*

#4. Wound healing [MeSH Terms]

#5. ((#1 AND #2) NOT #3) AND #4

#6. Limit #5 to yr = “1980 – 2023”

Ovid EMBASE

#1 'wound'/exp OR wound OR 'injury'/exp OR injury OR 'ulcer'/exp OR ulcer OR acute OR chronic OR 'hard-to-heal' OR 'non healing'

#2 ('vibration'/exp OR vibration OR 'vibration therapy'/exp OR 'vibration therapy' OR 'whole body vibration'/exp OR 'whole body vibration' OR 'local vibration') NOT ('ultrasonogram'/exp OR ultrasonogram OR 'echography'/exp OR echography OR 'ultrasound therapy'/exp OR 'ultrasound therapy' OR 'ultrasonic therapy'/exp OR 'ultrasonic therapy')

#3 'wound healing'/exp OR 'wound healing'

#1 AND #2 AND #3

#1 AND #2 AND #3 AND ([english]/lim OR [japanese]/lim) AND [1980-2023]/py

Cochrane Library (Ovid)

#1 wound* OR injur* OR ulcer*

#2 "vibration therapy" OR "whole body vibration" OR "local vibration" NOT "ultraso*"

#3 #1 AND #2

#4 "wound healing"

#5 #3 AND #4

Ichu-shi-Web

#1 ((振動/TH or vibration/AL)) and (PT=原著論文)

#2 ((創傷と損傷/TH or 創傷/AL) or (創傷と損傷/TH or wound/AL) or (皮膚潰瘍/TH or 皮膚潰瘍/AL)) and (PT=原著論文)

#3 (治癒/TH or 治癒/AL) or healing/AL

#4 #1 AND #2 AND #3

IEEE

wound* OR injur* OR ulcer*

AND vibrat* OR "vibration therapy" OR "whole body vibration" OR "local vibration"

NOT ultraso*

AND "wound healing"

EBSCO CINAHL

#1 wound OR injur# OR ulcer

#2 (vibration therapy) OR (whole body vibration or whole-body vibration or wbv) OR (local vibration) NOT (ultrasound or ultrasonic)

#3 #1 AND #2

Scopus

#1 (wound OR injur* OR ulcer OR sore)

#2 ("vibration therapy" OR "whole body vibration" OR "local vibration" NOT ultrasound)

#3 #1 AND #2

Web of Science

#1 wound OR injur* OR ulcer

#2 "vibration therapy" OR "whole body vibration" OR "local vibration" NOT ultraso*

#3 #1 AND #2

PEDro

vibration therapy
